# Supplementary material
Source: PubMed Central journal article supplement (PMC4821589)
Supplement: NIHMS772230-supplement-Supplemental_content.pdf [file NIHMS772230-supplement-Supplemental_content.pdf]

## Supplementary Online Content

Wilson PA, Kahana SY, Fernandez MI, et al. Sexual risk behavior among virologically detectable human immunodeficiency virus–infected young men who have sex with men. *JAMA Pediatr*. Published online December 7, 2015.  
doi:10.1001/jamapediatrics.2015.3333

**eTable.** Univariable Analyses Predicting Condomless Anal Intercourse in Past 3 Months Among Virologically Detectable HIV-Infected YMSM (n=688)

This supplementary material has been provided by the authors to give readers additional information about their work.

**eTable.** Univariable Analyses Predicting Condomless Anal Intercourse in Past 3 Months Among Virologically Detectable HIV-Infected YMSM (n=688)

| Variable                     | Condomless anal intercourse |               | Serodiscordant condomless anal intercourse |                          |
|------------------------------|-----------------------------|---------------|--------------------------------------------|--------------------------|
|                              | Odds Ratio                  | 95% CI        | Odds Ratio                                 | 95% CI                   |
| Age ≥ 21                     | 1.25                        | 0.91 - 1.74   | 0.97                                       | 0.70 - 1.34              |
| Current employment           | 0.96                        | 0.76 - 1.25   | 0.76                                       | 0.58 - 1.00*             |
| Post high school education   | 1.21                        | 0.93 - 1.59   | 1.19                                       | 0.91 - 1.56              |
| Transgender                  | 0.47                        | 0.22 - 1.00*  | 0.60                                       | 0.29 - 1.26              |
| Black race                   | 0.60                        | 0.43 - 0.84** | 0.64                                       | 0.46 - 0.89**            |
| Hispanic ethnicity           | 1.17                        | 0.80 - 1.71   | 1.33                                       | 0.91 - 1.94              |
| Ever incarcerated            | 1.16                        | 0.84 - 1.61   | 1.09                                       | 0.77 - 2.73              |
| Current unstable housing     | 1.69                        | 0.83 - 3.46   | 1.45                                       | 0.77 - 2.73              |
| Prescribed ART               | 0.79                        | 0.57 - 1.11   | 0.94                                       | 0.67 - 1.31              |
| On ART ≤ 6 months            | 0.97                        | 0.64 - 1.45   | 1.15                                       | 0.77 - 1.73              |
| Disclosure to sex partner(s) | 1.41                        | 1.01 - 1.98*  | 1.32                                       | 0.94 - 1.86              |
| CRAFFT                       | 1.22                        | 1.11 - 1.34** | 1.19                                       | 1.09 - 1.31**            |
| Daily alcohol use            | 1.95                        | 1.02 - 3.74*  | 1.78                                       | 0.98 - 3.23 <sup>†</sup> |
| Daily marijuana use          | 0.74                        | 0.51 - 1.08   | 0.74                                       | 0.51 - 1.08              |
| BSI Depression               | 1.04                        | 1.01 - 1.06** | 1.05                                       | 1.02 - 1.07**            |
| BSI Anxiety                  | 1.04                        | 1.01 - 1.07*  | 1.03                                       | 1.00 - 1.06*             |
| BSI GSI                      | 1.31                        | 1.07 - 1.61** | 1.30                                       | 1.07 - 1.58**            |

Note: *CRAFFT* = Car, Relax, Alone, Forget, Friends, Trouble (keywords in a screening questionnaire to identify at-risk teen substance abusers); *BSI* = *Brief Symptom Inventory*; *GSI* = *Global Severity Index*  
 \*\*  $p \leq .01$ , \*  $p \leq .05$ , <sup>†</sup>  $p \leq .10$
